# Supplementary material for: Distinct cellular expression and subcellular localization of Kv2 voltage-gated K+ channel subtypes in dorsal root ganglion neurons conserved between mice and humans
Source: PubMed Central journal article supplement — bioRxiv. 2023 Dec 24:2023.03.01.530679. Preprint. [Version 2] doi: 10.1101/2023.03.01.530679 (PMC10769185; doi:10.1101/2023.03.01.530679), 2023-12-24
Supplement: NIHPP2023.03.01.530679V2-supplement-1.pdf [file NIHPP2023.03.01.530679V2-supplement-1.pdf]

# SUPPLEMENTAL FIGURES

## Supplemental Figure 1

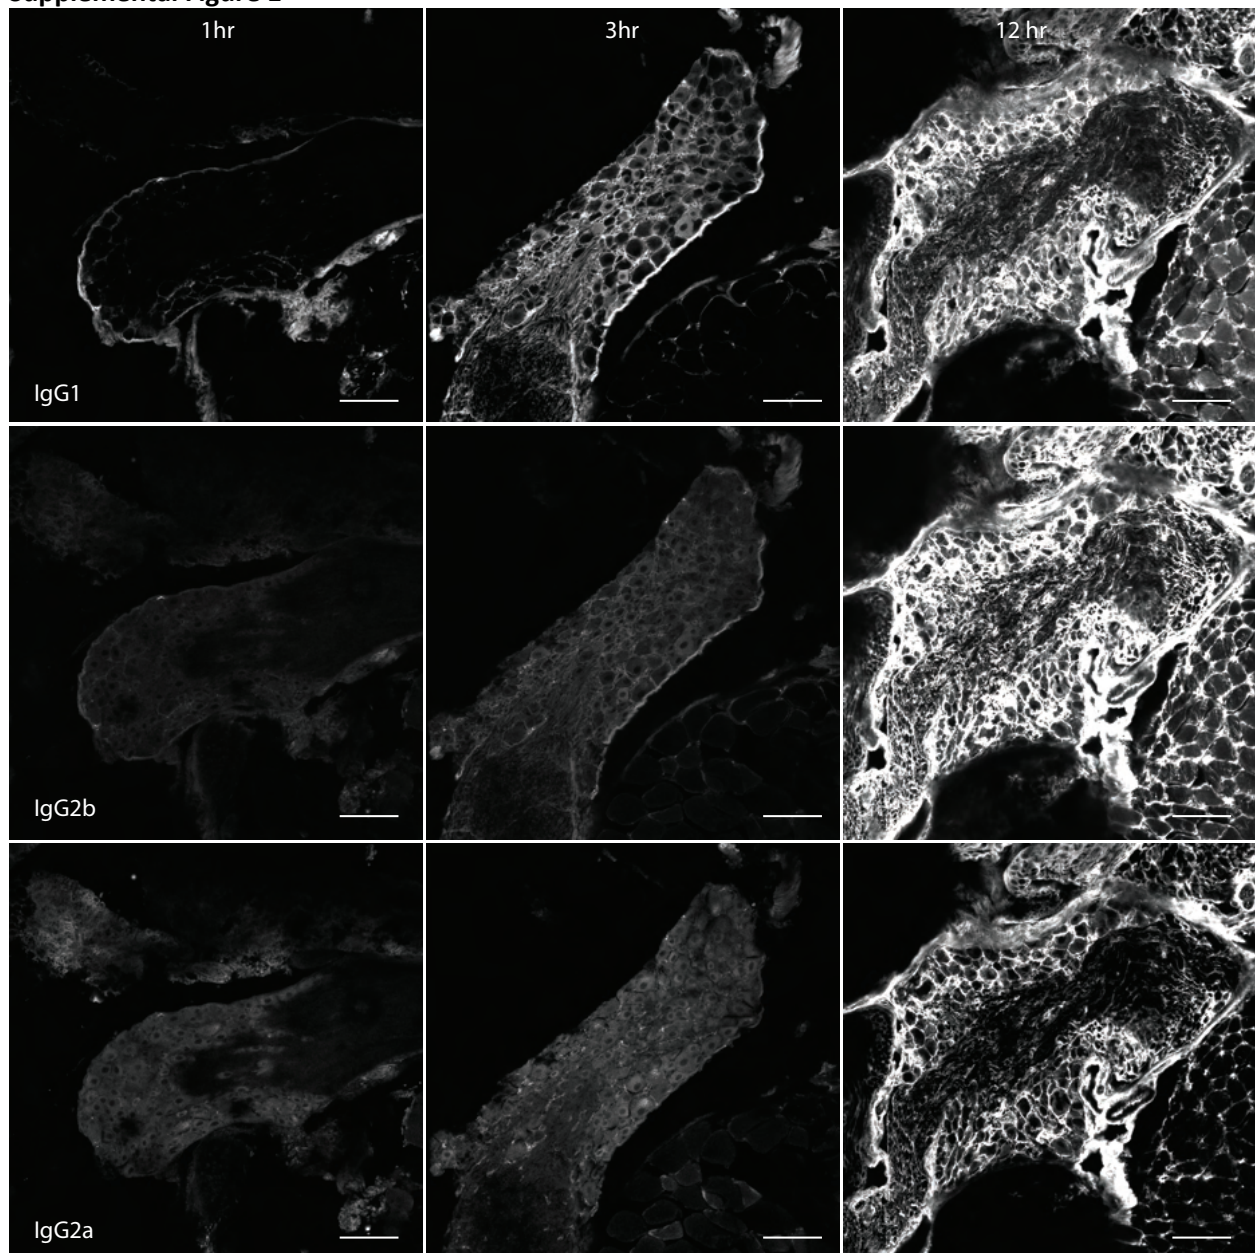

### Supplemental Figure 1 legend

Off-target mouse anti-IgG1, IgG2b, and IgG2a immunofluorescence increases with fixation time. Images of DRG sections labeled with fluorescently tagged antibodies which target IgG1 (top), IgG2b (middle) and IgG2a (bottom) after DRG were fixed in ice cold 4% PFA for 1, 3 and 12 hours. DRG sections are from the same mouse. Scale bars are 100  $\mu$ m.

1076 **Supplemental Figure 2**

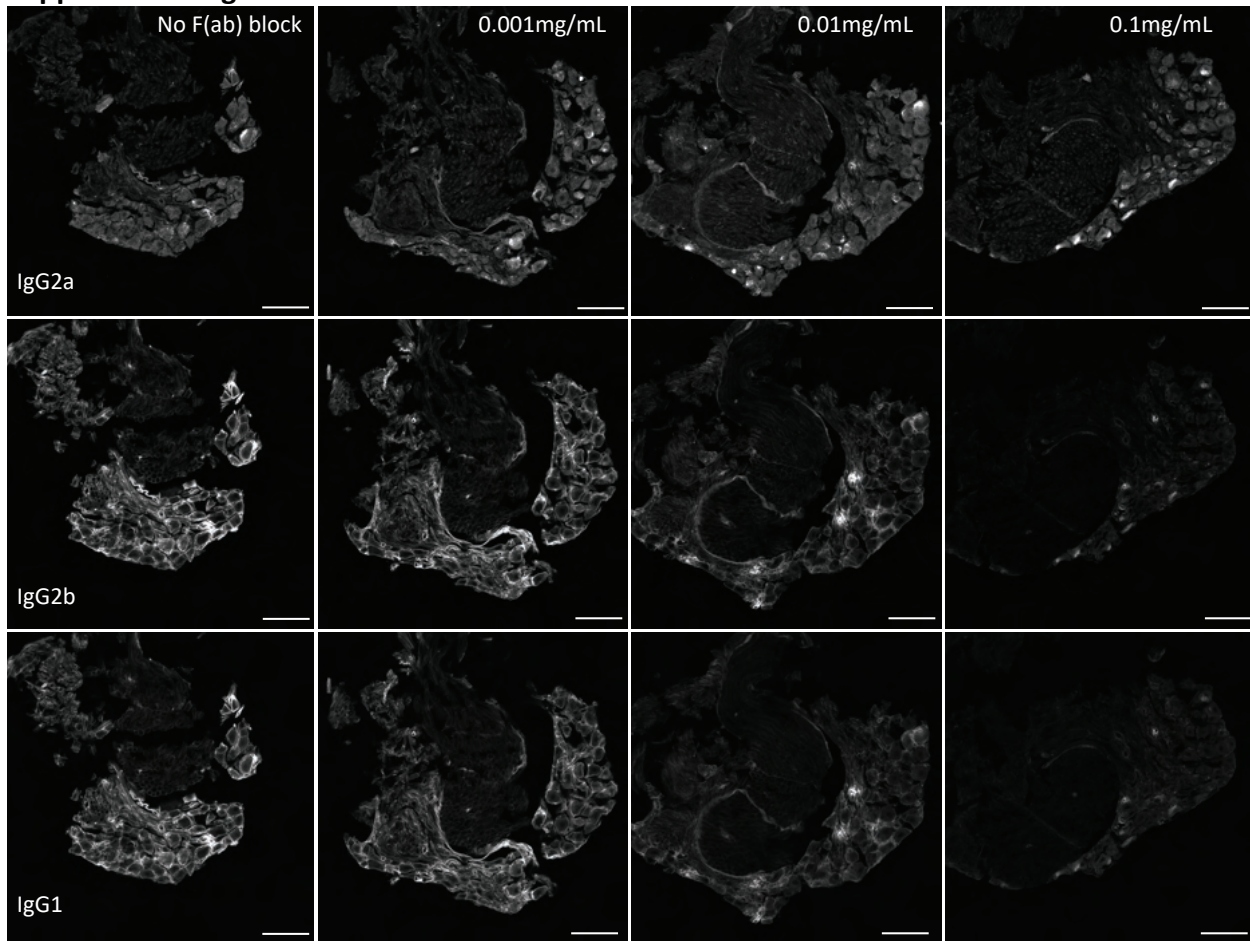

1077 **Supplemental Figure 2 legend**

1078 Pre-incubation of mouse DRG sections in IgG H+L Fab fragments reduces off target secondary  
1079 antibody labeling. Representative images of DRG sections from the same DRG treated with  
1080 increasing concentrations (left to right) of IgG H+L Fab fragment and the same concentration of  
1081 secondary antibody used in experiments throughout this study. Images were taken with  
1082 identical imaging settings and are set to the same brightness and contrast. Scale bars are 100  
1083  $\mu\text{m}$ .  
1084

# Supplemental Figure 3

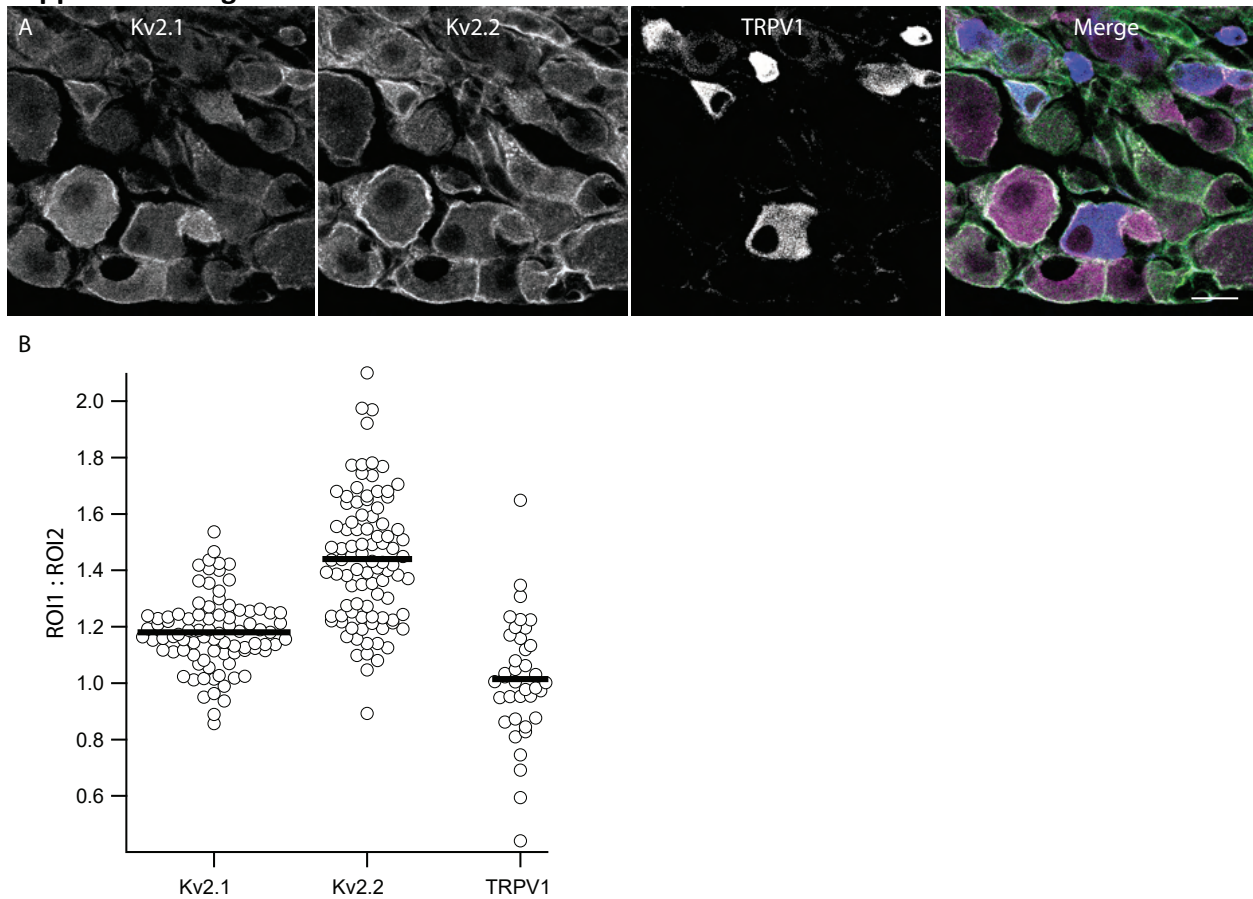

## Supplemental Figure 3 legend

Kv2.1 and Kv2.2 protein are enriched at the outer edge of DRG neuron somas relative to TRPV1. **A**, Anti-Kv2.1, anti-Kv2.2 and anti-TRPV1 immunofluorescence from lumbar DRG neurons. Prominent cytoplasmic anti-TRPV1 immunofluorescence was observed in a subset of small diameter neurons. In merge image anti-Kv2.1, anti-Kv2.2 and anti-TRPV1 immunofluorescence are magenta, green and blue respectively. Scale bar is 20  $\mu$ m. **B**, Ratio of average anti-Kv2.1, anti-Kv2.2 or anti-TRPV1 immunofluorescence from outer and inner ROIs for individual neurons.

# Supplemental Figure 4

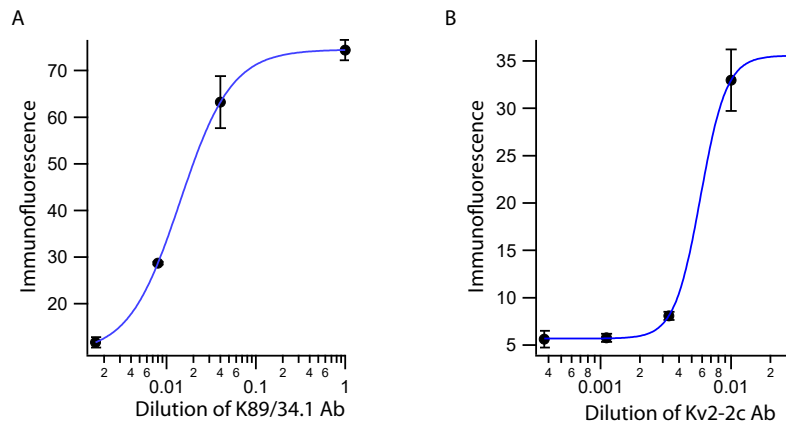

## Supplemental Figure 4 legend

Kv2 antibodies used in knockout experiments are at saturating concentrations. **A**, Concentration response of immunofluorescence from sections labeled with anti-Kv2.1 antibody used in Figure 2. Blue line is a Hill fit of the data. 1:1 = 2 sections, 1:25 = 3 sections, 1:125 = 2 sections, 1:625 = 3 sections **B**, Concentration response of immunofluorescence from sections labeled with anti-Kv2.2 antibody used in Figure 3. Blue line is a Hill fit of the data. 1:33 = 2 sections, 1:100 = 10 sections, 1:300 = 4 sections, 1:900 = 4 sections, 1:2700 = 3 sections

# Supplemental Figure 5

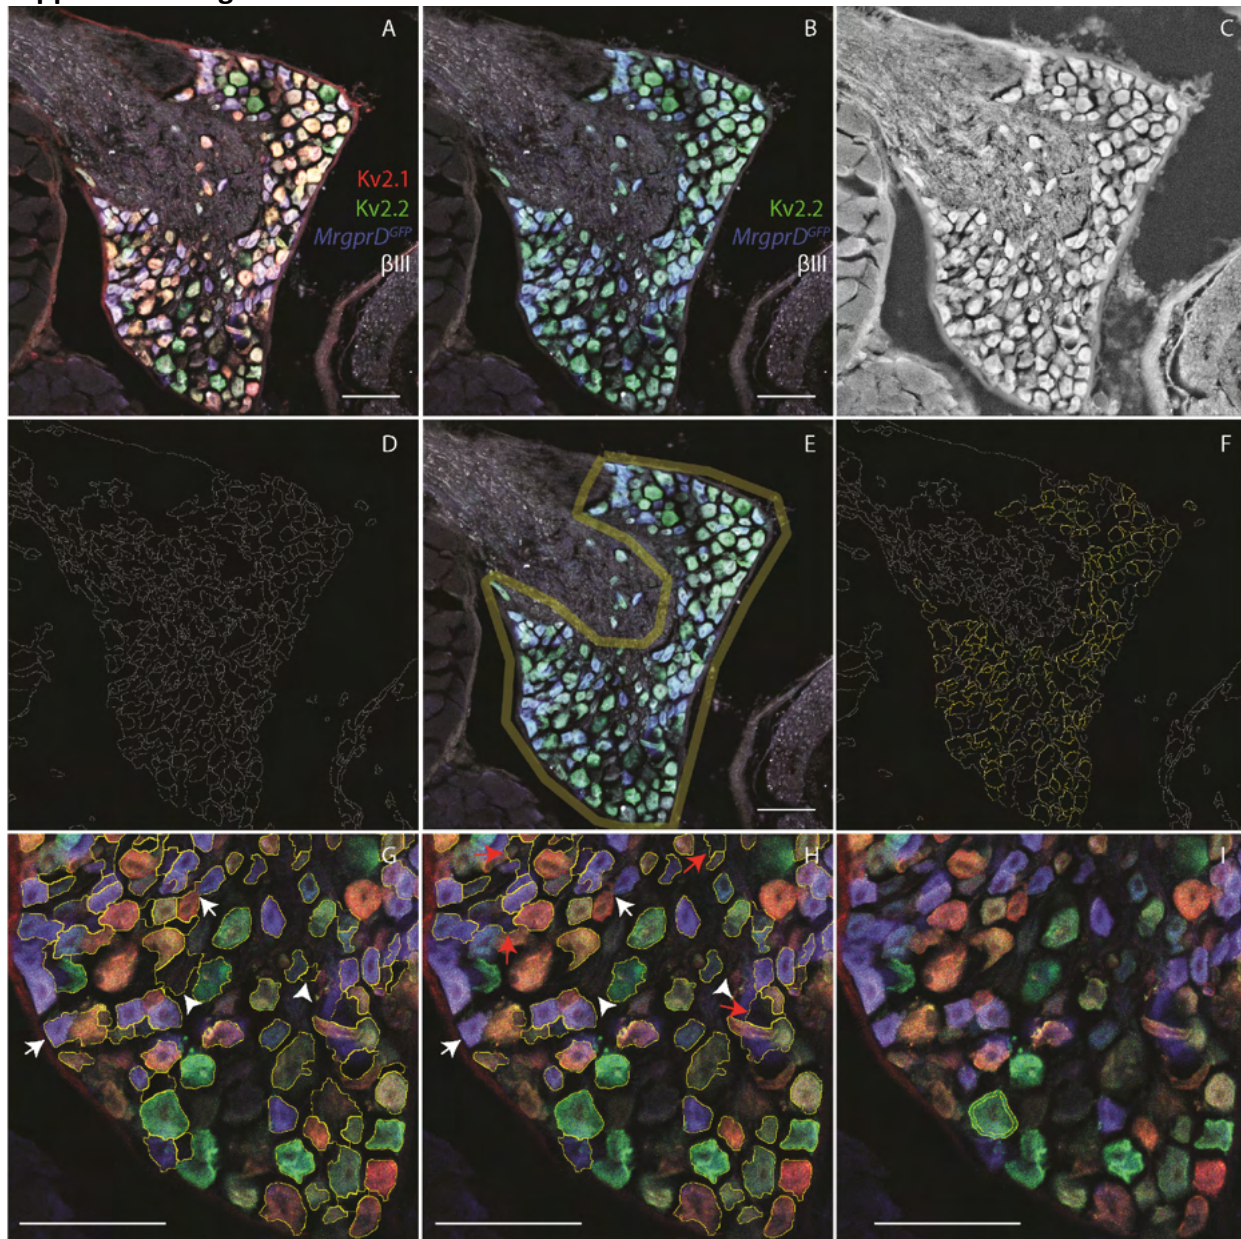

## Supplemental Figure 5 legend

A method to sample neurons in DRG imaging data using watershed segmentation identifies the outer region of neurons. **A**, Image of anti-Kv2.1, anti-Kv2.2, anti-βIII tubulin immunofluorescence and MrgprD-GFP fluorescence. **B**, Same image as A with anti-Kv2.1 immunofluorescence channel removed as this is an example of processing data for Kv2.1 KO analysis. **C**, Grayscale image of average fluorescence from all three channels shown in B. Gaussian and median filters were applied to image to improve watershed segmentation. **D**, Watershed segmentation of image in C using the MorphoLibJ Morphological Segmentation Plugin in Fiji. **E**, Example of manually drawn boundary that encompasses the neuron somas in the DRG so that only these watershed lines are selected. **F**, Selected ROIs from watershed segmentation (yellow). ROIs were excluded based on roundness and size using the Analyze

1120 Particles tool in Fiji. **G**, ROIs in F overlaid on DRG image showing that some ROIs are selecting  
 1121 regions that do not contain neurons (arrow heads) or are selecting multiple neurons (arrows).  
 1122 **H**, ROIs after processing using an in-house R script which removes ROIs that do not contain  
 1123 neurons (arrow heads) and ROIs that contain two neurons (arrows). This script did not remove  
 1124 all ROIs that do not contain neurons (red arrows). Each experiment performed was done  
 1125 alongside controls where the primary antibodies were omitted and fluorescence from these  
 1126 control sections was used by the in-house R script to identify and remove ROIs that do not  
 1127 contain neurons. **I**, Example of automatically generated annulus that encompasses the outer  
 1128 edge of the soma. Scale bars are 100  $\mu\text{m}$ .  
 1129

# Supplemental Figure 6

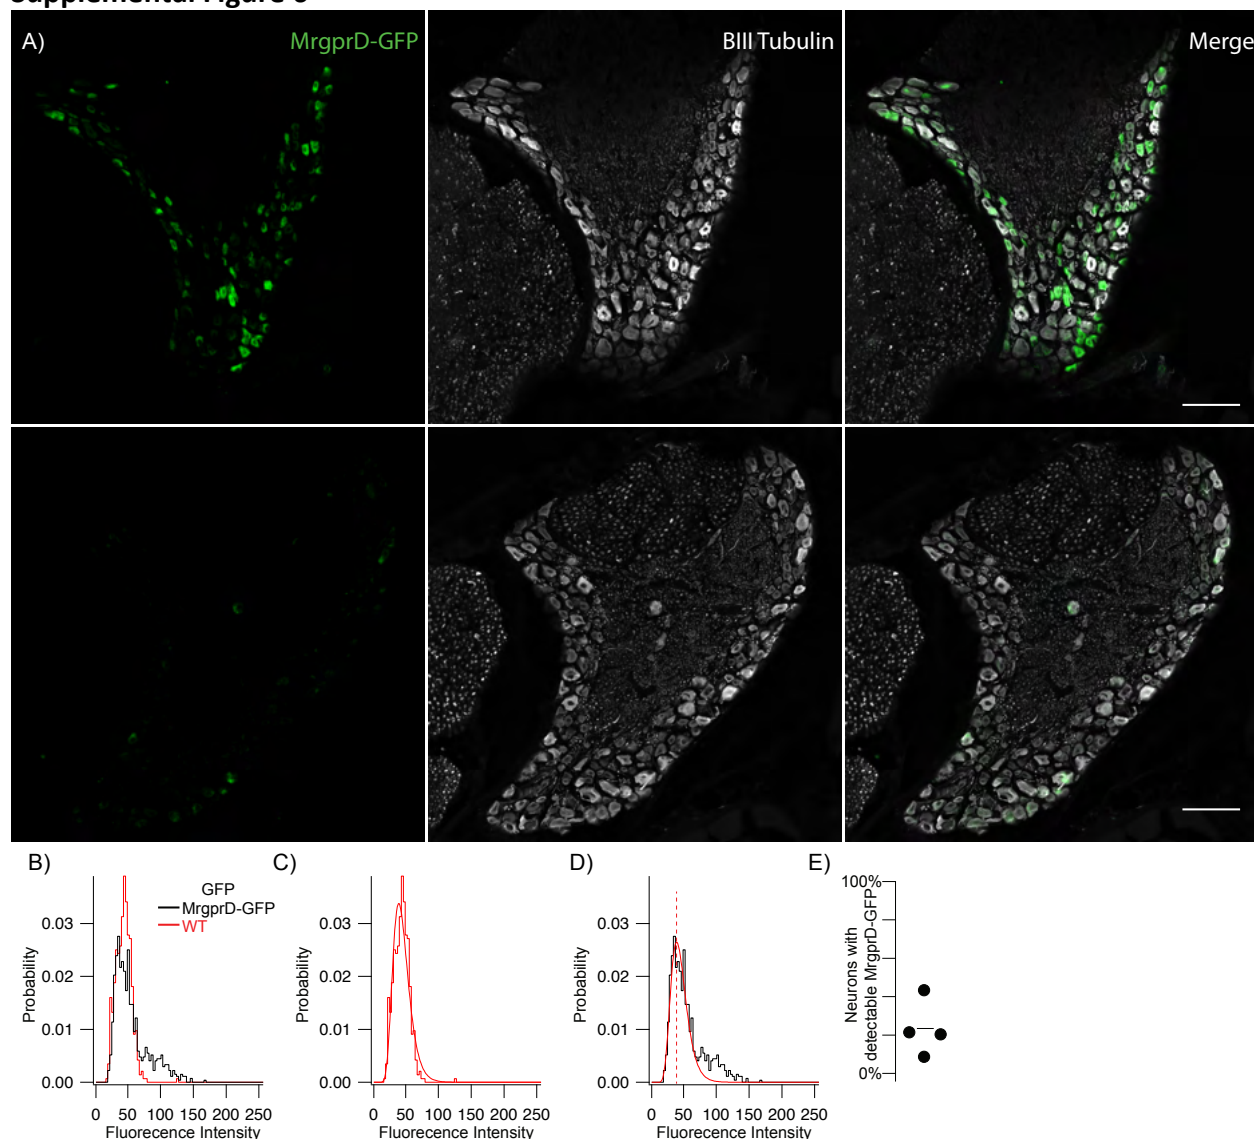

## Supplemental Figure 6 legend

Method used to estimate percent of neurons expressing Kv2.1 and Kv2.2 reliably predicts the percentage of neurons that express GFP in MrgprD-GFP mice. **A**, MrgprD-GFP (top) and WT (bottom) DRG sections immunolabeled for BIII tubulin (white). Images were taken with identical imaging settings and are set to the same brightness and contrast. Scale bars are 100 μm. **B**, Distribution of fluorescence intensity from MrgprD-GFP (black) and WT (red) neurons. Data represents the fluorescence intensity of 905 MrgprD-GFP neurons from 9 DRG sections from 1 mouse or 477 WT neurons from 5 DRG sections from 1 mouse. DRG sections were taken from 7 week old female mice and are from the 1<sup>st</sup> lumbar DRG. **C**, WT data shown in B fit with a log normal distribution (red fit). **D**, MrgprD-GFP data shown in B fit with the WT distribution (red fit) where width and mean were constrained to the WT distribution and amplitude was unconstrained (equation 1). Only MrgprD-GFP data to the left of the mean intensity of WT neurons (red dotted line) was used for the fit. **E**, Percent of neurons with detectable GFP protein of 4 mice (3 females 1 male). All DRG sections were taken from the 1<sup>st</sup> lumbar DRG.

# 1146 Supplemental Figure 7

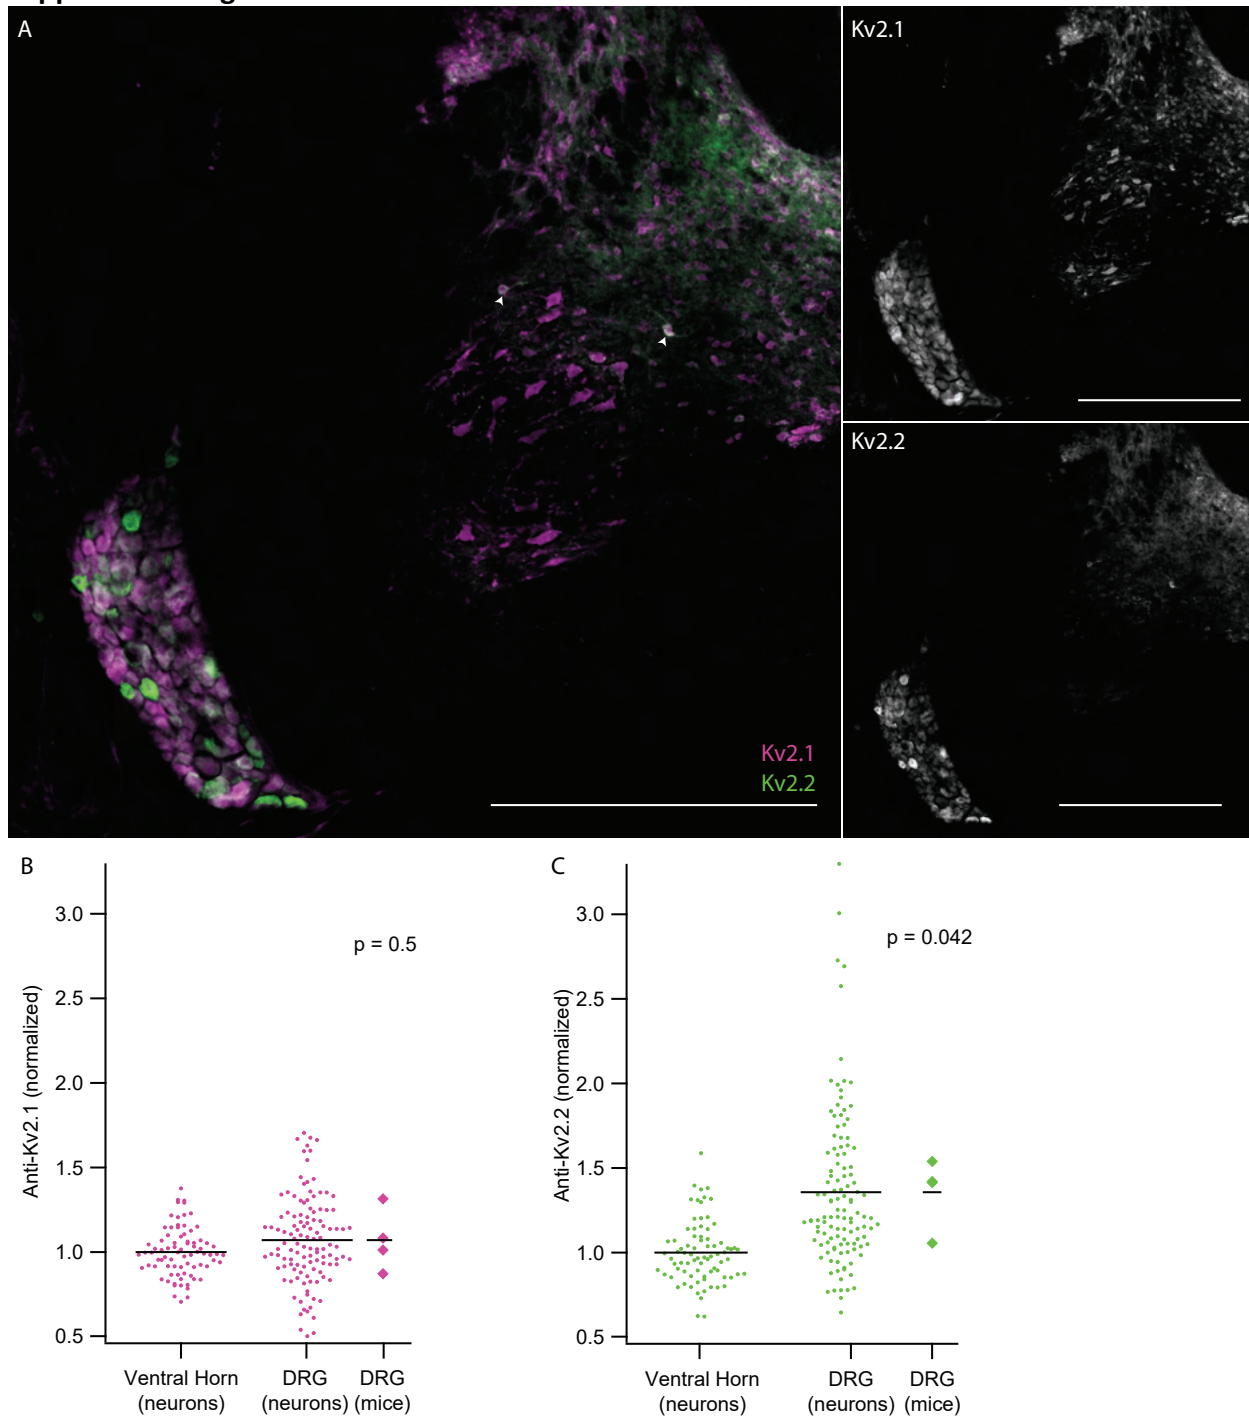

## Supplemental Figure 7 legend

DRG neurons have enriched Kv2.2 protein compared to neurons in the ventral horn. **A**, Anti-Kv2.1 (magenta) and anti-Kv2.2 (green) immunofluorescence in a spinal cord section from the 13<sup>th</sup> thoracic vertebra (left). Anti-Kv2.1 immunofluorescence (right top) and anti-Kv2.2 immunofluorescence (right bottom). Arrow heads show neurons in the spinal cord with anti-Kv2.2 immunofluorescence. Scale bars are 500  $\mu$ m. **B**, Anti-Kv2.1 immunofluorescence from

1154 individual neurons (circles) in the DRG and ventral horn normalized to the average fluorescence  
 1155 intensity of neurons in the ventral horn. Diamonds to the right of data represent the average  
 1156 intensity in the DRG of individual mice. Significant differences from 1 were calculated for  
 1157 individual mice using Students t-test. N = 4 mice n = 116 in DRG and n = 77 in ventral horn. **C**,  
 1158 Identical analysis shown in B with anti-Kv2.2 immunofluorescence.  
 1159

# Supplemental Figure 8

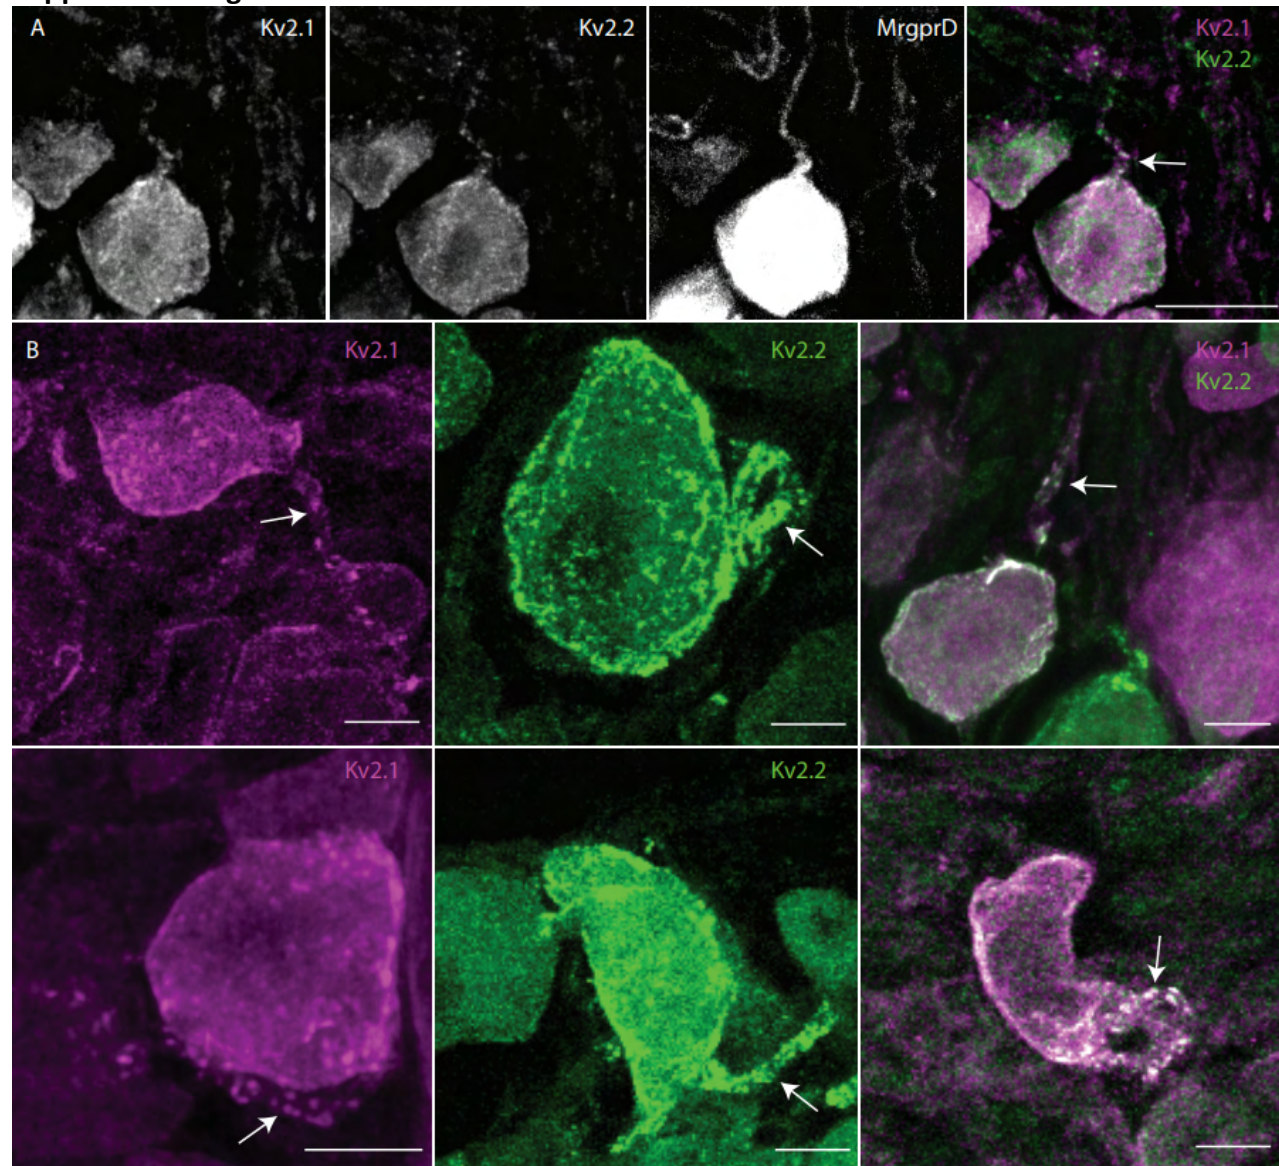

## Supplemental Figure 8 legend

Kv2 channels are expressed on the stem axon of mouse DRG neurons. **A**, Z-projection with anti-Kv2.1 and anti-Kv2.2 immunofluorescence on the stem axon of a neuron in the DRG of a MrgprD-GFP mouse. **B**, Gallery of z-projected images of DRG neurons with anti-Kv2.1 and/or anti-Kv2.2 immunofluorescence on stem axons. Arrows indicate stem axons. Scale bars are 10 μm

1168 **Supplemental Figure 9**

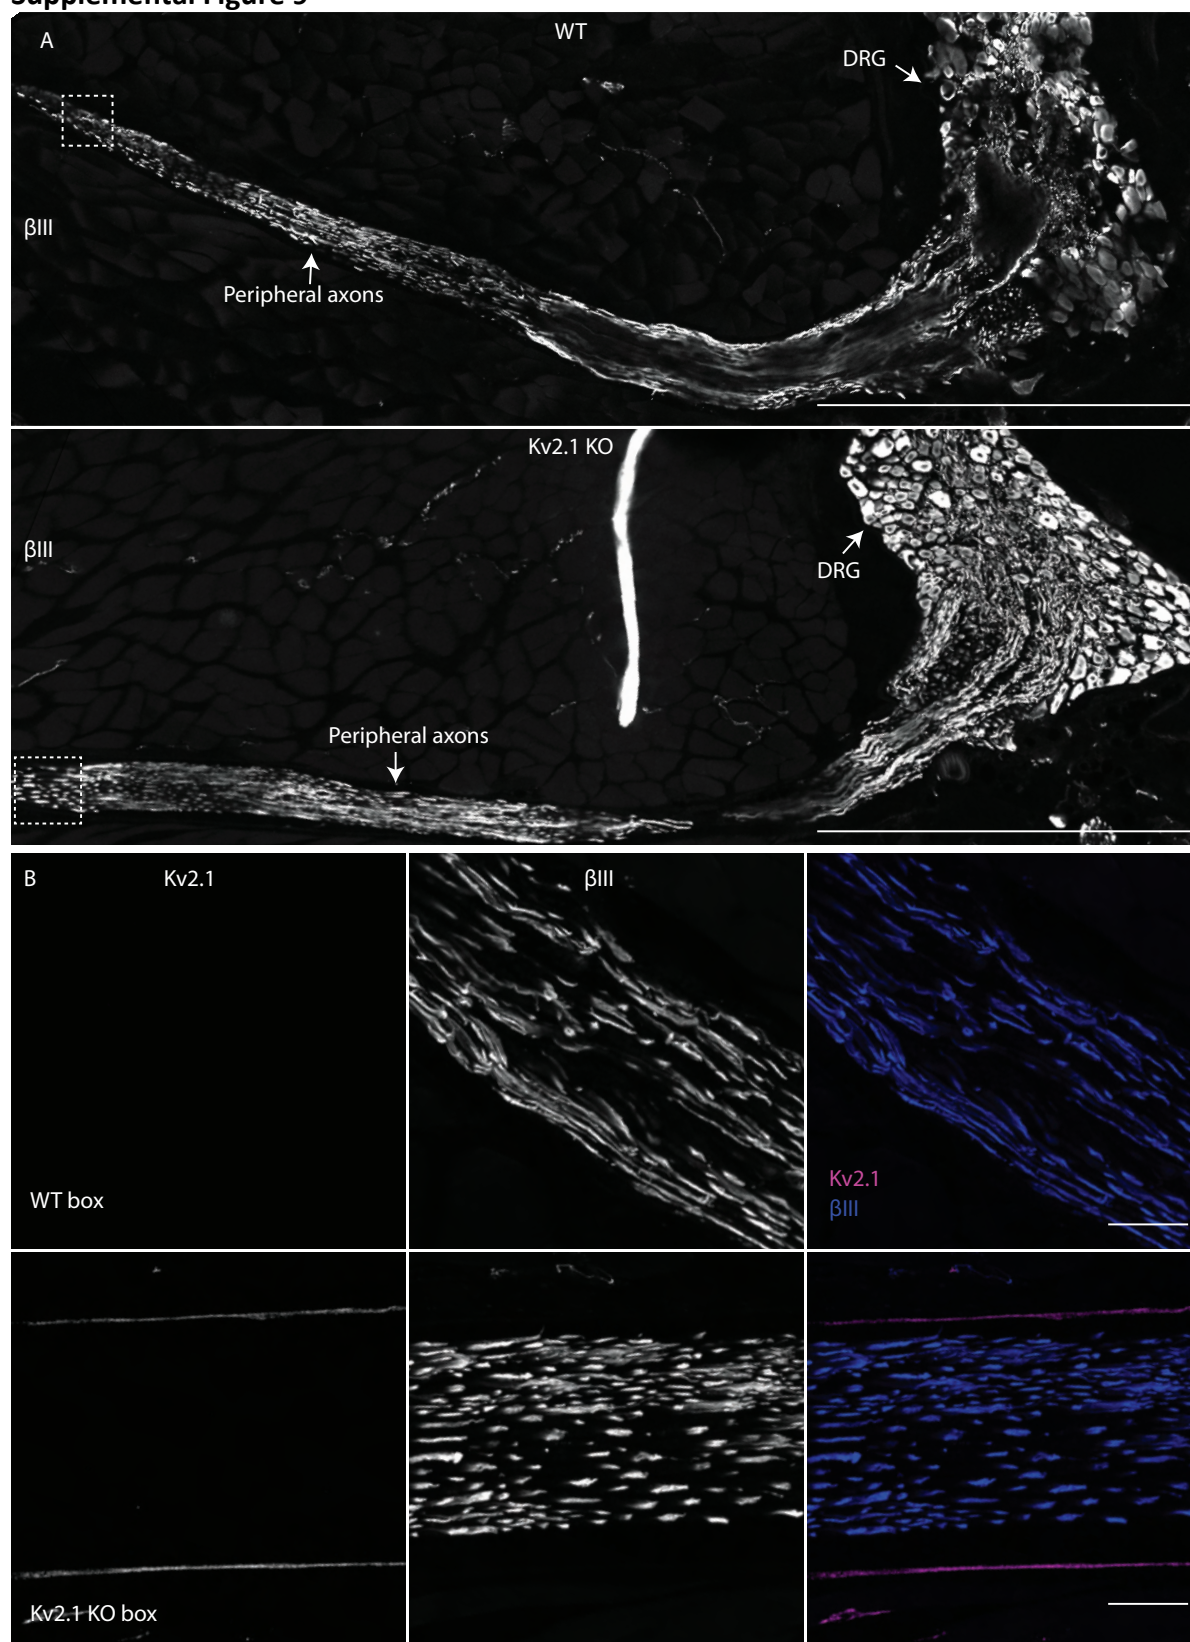

1169

**Supplemental Figure 9 legend**

Kv2.1 channels were not detected in peripheral axons of DRG neurons. **A**, WT (top) and Kv2.1 KO (bottom) sections containing the DRG and peripheral axons from the 12<sup>th</sup> thoracic DRG in age and sex matched 7 week old mice immunolabeled for  $\beta$ III tubulin (white). Scale bar is 500  $\mu$ m. **B**, High magnification z-projection of anti-Kv2.1 and anti- $\beta$ III immunofluorescence from box in A of WT and Kv2.1 KO mice. Scale bars are 20  $\mu$ m.

# Supplemental Figure 10

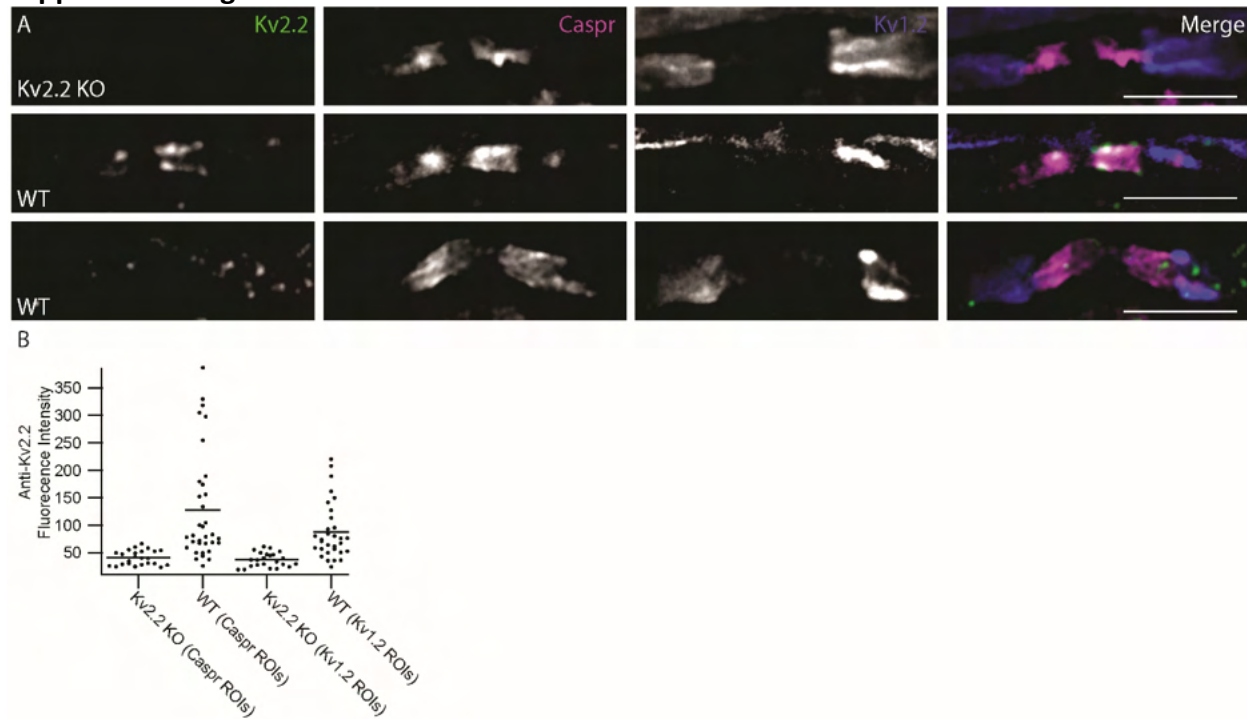

## Supplemental Figure 10 legend

Kv2.2 is expressed in myelinated fibers of DRG neuron axons. **A**, Kv2.2 KO (top) and WT (middle and bottom) sections containing the peripheral axons from the 12<sup>th</sup> thoracic DRG in 28 week old mice immunolabeled for Kv2.2, Caspr and Kv1.2. Middle panels are an exemplar of prominent Kv2.2 immunofluorescence in CASPR labeled axons and bottom panels are an exemplar of prominent Kv2.2 clusters in the Kv1.2 labeled axons. Scale bars are 5 μm. **B**, Analysis of anti-Kv2.2 immunofluorescence intensity in CASPR and Kv1.2 labeled regions of age and sex matched WT and Kv2.2 KO mice. Individual points represent single ROIs drawn around anti-CASPR or anti-Kv1.2 immunofluorescence.

# Supplemental Figure 11

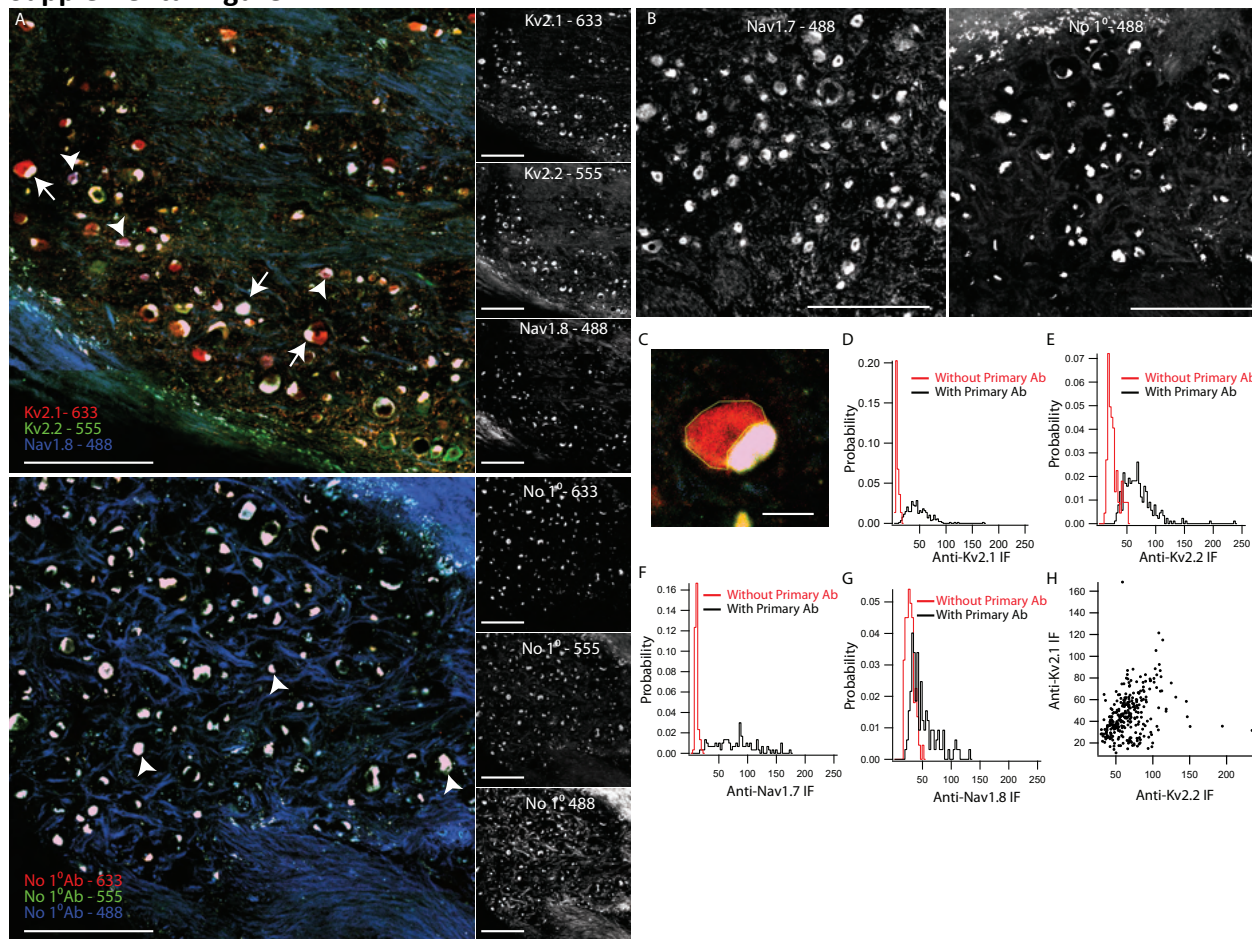

## Supplemental Figure 11 legend

Fluorescence from human DRG neurons labeled with ion channel targeting antibodies is distinct from human DRG neurons where ion channel targeting antibodies were omitted. **A**, Top: Immunofluorescence from human DRG section labeled with anti-Kv2.1, anti-Kv2.2 and anti-Nav1.8 antibodies. Bottom: Fluorescence from human DRG section where the primary antibodies are omitted. Arrows in top and bottom images indicate examples of autofluorescence from apparent intracellular lipofuscin. Arrow heads in top image identify anti-Nav1.8 immunofluorescence. Images on the right are fluorescence from each fluorescence channel of the top and bottom images. Number next to target protein label represents excitation wavelength. DRG sections from top and bottom images are from the same DRG. Scale bars are 500  $\mu$ m. **B**, Left: Immunofluorescence from human DRG section labeled with anti-Nav1.7 antibody. Right: Fluorescence from human DRG section where the primary antibody has been omitted. Number next to target protein label represents excitation wavelength. DRG sections in left and right images are from the same DRG. Scale bars are 500  $\mu$ m. **C**, Exemplar manually drawn ROI to analyze fluorescence intensity in human DRG neurons that omits apparent lipofuscin autofluorescence. Scale bar is 50  $\mu$ m. **D**, Distribution of fluorescence intensity of human DRG neurons labeled with an anti-Kv2.1 antibody (black) or when the anti-Kv2.1 antibody was omitted (red). Data represents the fluorescence intensity of 293 neurons labeled with anti-Kv2.1 antibody or 73 neurons where the anti-Kv2.1 antibody was omitted. **E**,

1212 Distribution of fluorescence intensity of human DRG neurons labeled with anti-Kv2.2 antibody  
 1213 (black) or when the anti-Kv2.2 antibody was omitted (red). Data represents the fluorescence  
 1214 intensity of 293 neurons labeled with anti-Kv2.2 antibody or 73 neurons where the anti-Kv2.2  
 1215 antibody was omitted. **F**, Distribution of fluorescence intensity of human DRG neurons labeled  
 1216 with anti-Nav1.7 antibody (black) or when the anti-Nav1.7 antibody was omitted (red). Data  
 1217 represents the fluorescence intensity of 99 neurons labeled with anti-Nav1.7 antibody or 99  
 1218 neurons where the anti-Nav1.7 antibody was omitted. **G**, Distribution of fluorescence intensity  
 1219 of human DRG neurons labeled with anti-Nav1.8 antibody (black) or when the anti-Nav1.8  
 1220 antibody was omitted (red). Data represents the fluorescence intensity of 293 neurons labeled  
 1221 with anti-Nav1.8 antibody or 73 neurons where the anti-Nav1.8 antibody was omitted. **H**,  
 1222 Fluorescence intensity of human neurons labeled with both anti-Kv2.1 and anti-Kv2.2  
 1223 antibodies. Individual points represent individual neurons. All images are from donor #2.  
 1224 Detailed information on each donor can be found in the *Human Tissue Collection* section of the  
 1225 methods.  
 1226

# Supplemental Figure 12

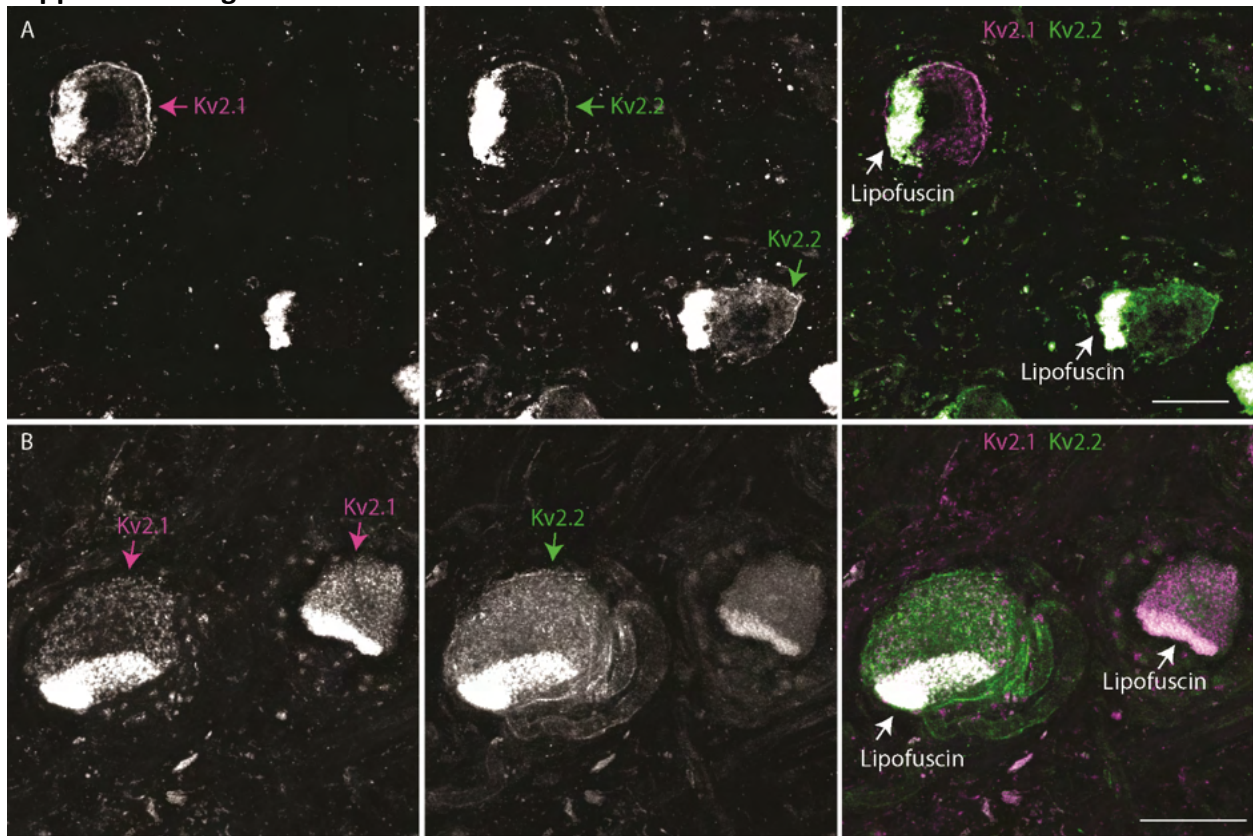

## Supplemental Figure 12 legend

Immunofluorescence from human DRG neurons from donor #2 **A** and donor #3 **B** labeled with anti-Kv2.1 and anti-Kv2.2 antibodies. Autofluorescence attributed to lipofuscin is labeled in right panels while apparent Kv2.1 and Kv2.2 protein are labeled in left and middle panels respectively. Scale bars are 50  $\mu$ m. Detailed information on each donor can be found in the *Human Tissue Collection* section of the methods.

# Supplemental Figure 13

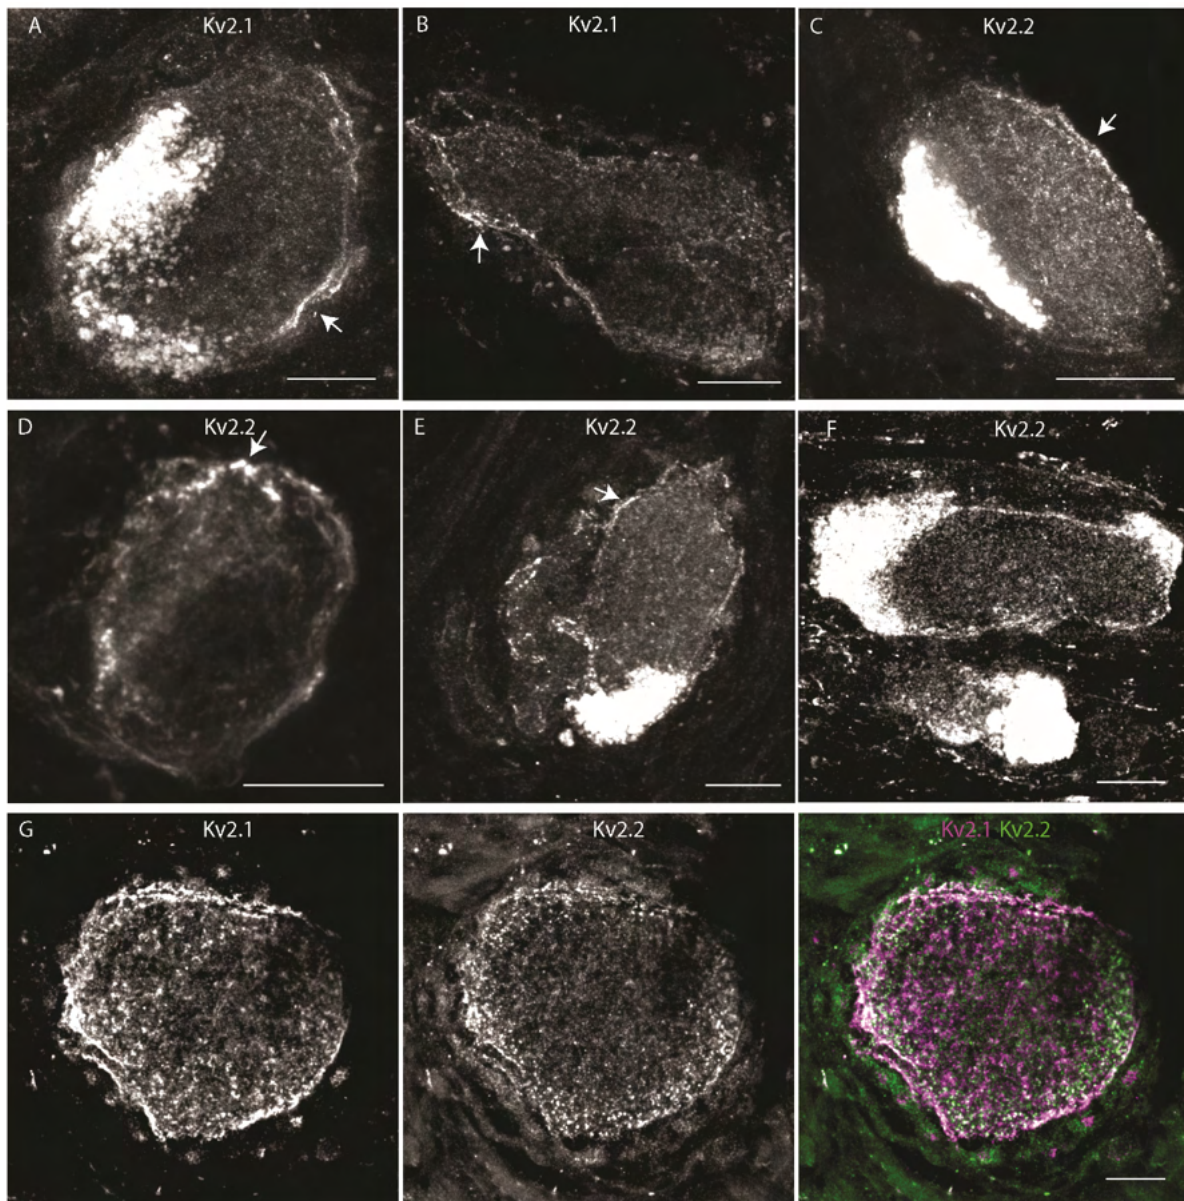

## Supplemental Figure 13 legend

Kv2 channels are enriched at the outer edge of human DRG neurons. **A-B**, Exemplar z-projections of anti-Kv2.1 immunofluorescence enriched at the outer surface of human DRG neurons. Arrows indicate asymmetric clusters. Images are from donor #2. Scale bars are 20 μm. **C-F**, Exemplar z-projections of anti-Kv2.2 immunofluorescence enriched at the outer surface of a human DRG neurons. Arrows indicate asymmetric clusters. Image in **E** is from donor #3 while all other images are from donor #2. Scale bars are 20 μm. **G**, Exemplar z-projection of anti-Kv2.1 and anti-Kv2.2 immunofluorescence both enriched at the outer surface of a human DRG neuron soma. Image is from donor #2. Scale bar is 20 μm. Detailed information on each donor can be found in the *Human Tissue Collection* section of the methods.

1249 **Supplemental Figure 14**

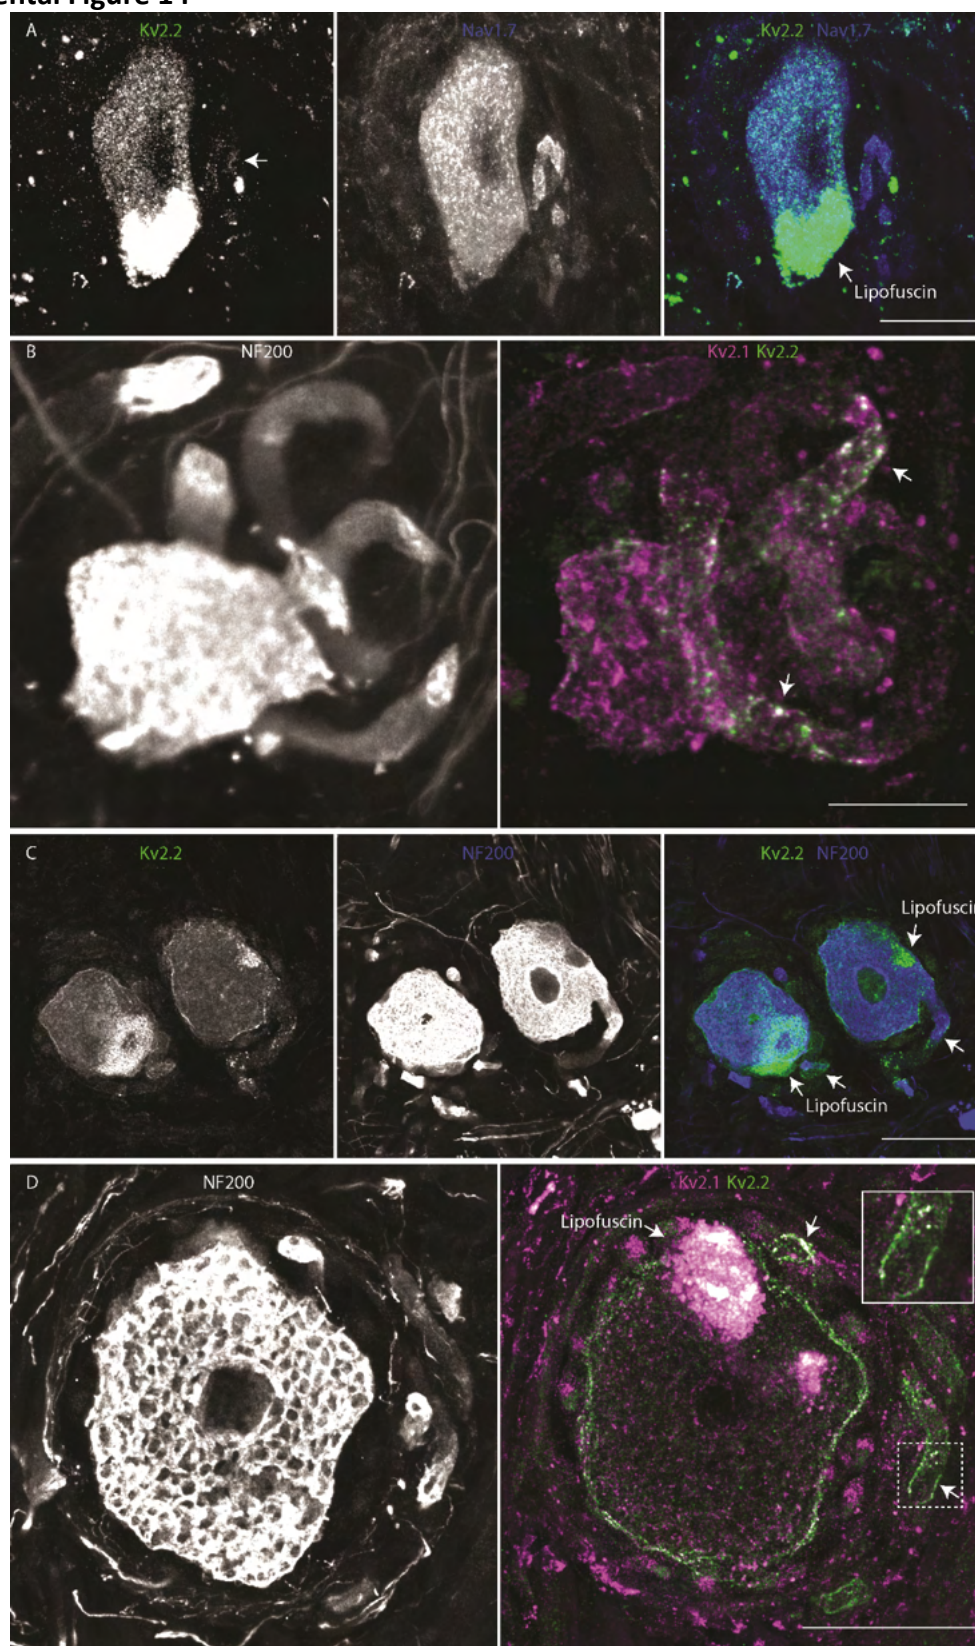

1250  
1251

# **Supplemental Figure 14 legend**

**A**, Z-projection of anti-Kv2.2 and anti-Nav1.7 immunofluorescence in a human DRG neuron soma and stem axon. Arrow in merge indicates the stem axon of the DRG neuron. Apparent lipofuscin autofluorescence is labeled in merge. Image is from donor #2. Scale bar is 20  $\mu\text{m}$ . **B**, Z-projection of anti-Kv2.1 (magenta), anti-Kv2.2 (green) (right) and anti-NF200 (left) immunofluorescence in a human DRG neuron soma and stem axon. Arrows in merge indicate the stem axon of the DRG neuron. Image is from donor #1. Scale bar is 20  $\mu\text{m}$ . **C**, Z-projection of anti-Kv2.2 (left) and anti-NF200 (middle) immunofluorescence in a human DRG neuron soma and stem axon. Arrow in merge indicates the stem axon of the DRG neuron. Apparent lipofuscin autofluorescence is labeled in merge. Image is from donor #1. Scale bar is 50  $\mu\text{m}$ . **D**, Z-projection of anti-Kv2.1 (magenta), anti-Kv2.2 (green) (right) and anti-NF200 (left) immunofluorescence in a human DRG neuron soma and stem axon. Arrows in merge indicate the stem axon of the DRG neuron. Apparent lipofuscin autofluorescence is labeled in merge. Image is from donor #3. Scale bar is 50  $\mu\text{m}$ . Detailed information on each donor can be found in the *Human Tissue Collection* section of the methods.

# Supplemental Figure 15

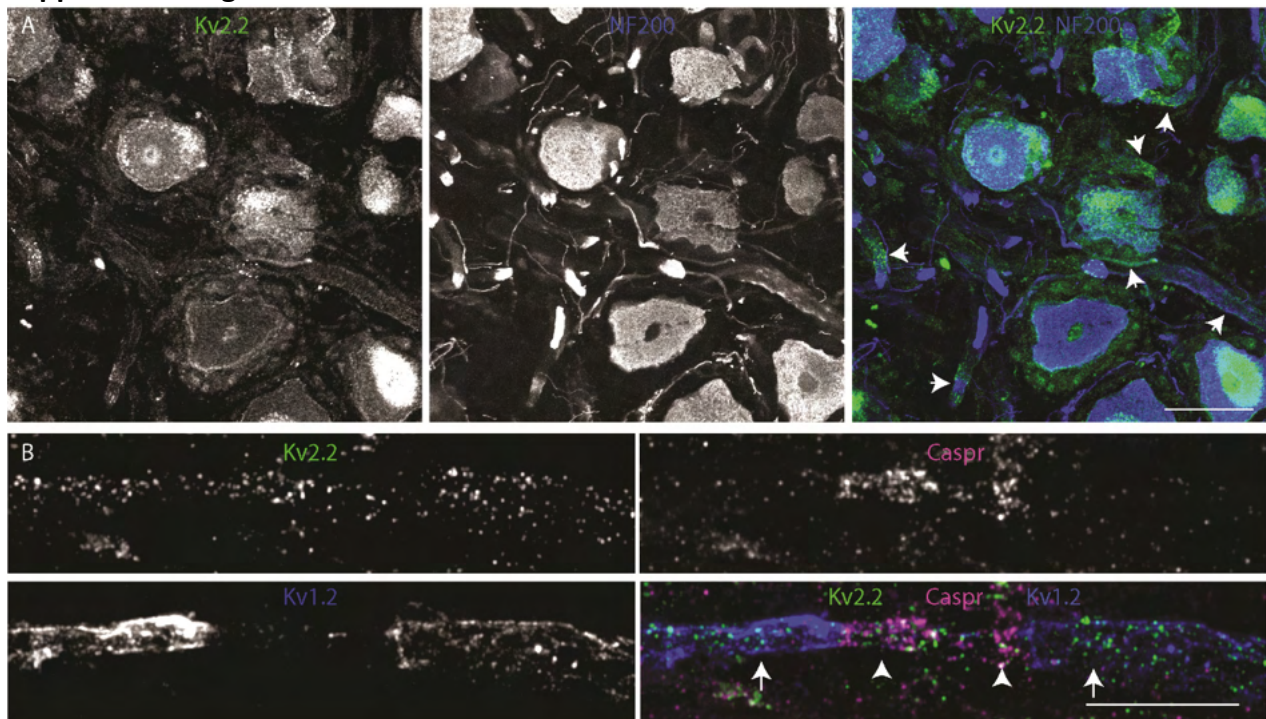

## Supplemental Figure 15 legend

**A**, Z-projection of anti-Kv2.2 (left) and anti-NF200 (middle) immunofluorescence of human DRG. Arrows in merge represent exemplar axons which have clear anti-Kv2.2 immunofluorescence. Image is from donor #1. Scale bar is 50 μm. **B**, Z-projection of anti-Kv2.2 (upper left), anti-CASPR (upper right) and anti-Kv1.2 (bottom left) immunofluorescence of human DRG axon. Image is from donor #2. Scale bar is 10 μm. Detailed information on each donor can be found in the *Human Tissue Collection* section of the methods.
